# Supplementary material for: Synergistic Effects of Incobotulinum Toxin and Physiotherapy in a Rare Case of Paraparesis in a 7-Years-Old Affected by Klippel-Feil Syndrome Related to MYH3 Gene Mutation: A Case Report
Source: Preprints.org preprint supplement (doi:10.20944/preprints202409.0766.v1), 2024-09-10
Supplement: Supplementary file 1 [file supplementary]

**Table 1.** ROM assessment of Right and Left Biceps Femoris during the study; data demonstrated improvement until 6 months after injection. () indicates minus.

|  | **T0** | **T1** | **T2** | **T3** | **T4** | **T5** |
| --- | --- | --- | --- | --- | --- | --- |
| **Right Biceps Femoris** | 20° (10°) | 5° (0°) | 5° (0°) | 5° (0°) | 7° (0°) | 10 (5°) |
| **Left Biceps Femoris** | 20° (15°) | 10° (0°) | 10° (0°) | 10° (0°) | 10° (0°) | 15° (7°) |

**Table 2:** this table shows MAS assessment of Right and Left Biceps Femoris during the study; data demonstrated improvement until 6 months after injection. () indicates minus.

|  | **T0** | **T1** | **T2** | **T3** | **T4** | **T5** |
| --- | --- | --- | --- | --- | --- | --- |
| **Right Biceps Femoris** | 3 | 1+ | 1+ | 1+ | 1+ | 3 |
| **Left Biceps Femoris** | 3 | 1+ | 1+ | 1+ | 2 | 3 |

**Table 3:** this table shows miometric tone assessment of Right and Left Biceps Femoris during the study; data demonstrated improvement until 6 months after injection. () indicates minus.

|  | **T0** | **T1** | **T2** | **T3** | **T4** | **T5** |
| --- | --- | --- | --- | --- | --- | --- |
| **Right Biceps Femoris** | 18,9 | 16,4 | 17,0 | 17,1 | 16,8 | 17,9 |
| **Left Biceps Femoris** | 20,4 | 17,0 | 17,3 | 17,5 | 18,6 | 19,6 |
